1 **A temperature dependent trophic cascade modifies temperature dependence of**  
2 **ecosystem function**

3

4 **Running head: Food chain length modifies effects of warming**

5 Jessica Garzke<sup>\*1,2</sup>, Stephanie J. Connor<sup>3</sup>, Ulrich Sommer<sup>1</sup> and Mary I. O'Connor<sup>4</sup>

6 1 Geomar Helmholtz Centre for Ocean Research Kiel, Dept. Experimental Ecology – Food  
7 Webs, Duesternbrooker Weg 20, DE-24105 Kiel, Germany

8 2 Institute of the Oceans and Fisheries, University of British Columbia, Vancouver, Canada,  
9 V6T 1Z4

10 3 Canadian Rivers Institute, Dept. of Biology, University of New Brunswick, Fredericton,  
11 Canada, E3B 5A3

12 4 Department of Zoology and Biodiversity Research Centre, University of British Columbia,  
13 Vancouver, Canada, V6T 1Z4

14 **Statement of authorship:** JG & MIO designed the study, MIO & US provided materials, JG  
15 & SJC performed research and collected data, JG performed zooplankton analysis, SJC  
16 performed phytoplankton analysis, JG & MIO performed modeling work, analyzed data  
17 output, and wrote the first draft, and all authors contributed substantially to reviews

18

19 **\*Corresponding author:** Jessica Garzke, [j.garzke@oceans.ubc.ca](mailto:j.garzke@oceans.ubc.ca), +1 778-772-6977,  
20 ORCID: 0000-0002-5881-1813

21 **Keywords:** community structure, metabolic theory of ecology, zooplankton, phytoplankton,  
22 temperature size rule, mesocosm experiment, ecosystem respiration, net primary production

23

24 Research paper

25

26 **Abstract**

27 Ecological communities and their ecosystem functions are sensitive to temperature, and  
28 aquatic habitats worldwide continue to experience unprecedented warming. Understanding  
29 ecological effects of warming requires linking empirical evidence to theories that allow  
30 projection to unobserved conditions. Metabolic scaling theory and its tests suggest that  
31 warming accelerates ecosystem functions (e.g., oxygen flux), yet this prediction apparently  
32 contradicts community-level studies suggesting warming is a stressor that can reduce  
33 ecosystem function. We sought to reconcile these predictions with an experimental test of the  
34 hypothesis that cascading trophic interactions modify the temperature-dependence of  
35 community structure and ecosystem fluxes. In a series of independent freshwater ecosystems  
36 exposed to a thermal gradient, we found that warmer temperatures strengthened the trophic  
37 cascade increased and indirectly changed community structure by altering grazer species  
38 composition and phytoplankton biomass. Temperature-driven community shifts only  
39 modestly affected the temperature dependence of net ecosystem oxygen fluxes. Over the 10  
40 °C thermal gradient, NPP and ER increased ~2.7-fold among ecosystems, while standing  
41 phytoplankton biomass declined by 85-95%. The exponential increase in oxygen flux over the  
42 thermal gradient, as well as monotonic declines in phytoplankton standing stock, suggested no  
43 threshold effects of warming across systems. We also observed temperature variation over  
44 time, within ecosystems. For phytoplankton biomass, temporal variation had the opposite  
45 effect to spatial variation, suggesting that within-community temporal change in community  
46 structure was not predicted by space-for-time substitution. We conclude that food chain  
47 length can modify effects of temperature on ecosystem fluxes, but that temperature can still  
48 have continuous and positive effects on ecosystem fluxes, consistent with patterns based on  
49 large-scale, macroecological comparisons. Changes in community structure, including  
50 temperature dependent trophic cascades, may be compatible with prevailing and predictable

51 effects of temperature on ecosystem functions related to fundamental effects of temperature

52 on metabolism.

53

## 54 **Introduction**

55           Understanding how warming associated with climate change affects species  
56 interactions and communities is one of the most pressing current ecological challenges. Two  
57 leading conceptual frameworks, the Metabolic Scaling Theory (MST) and community  
58 ecology, produce very different predictions for community-scale responses to environmental  
59 temperature. Metabolic scaling theory predicts that the relative temperature dependence of  
60 major metabolic functions explains a large fraction of variation in ecosystem fluxes and  
61 biomass stocks (López-Urrutia *et al.*, 2006; Enquist *et al.*, 2007; Wohlers *et al.*, 2009; Yvon-  
62 Durocher *et al.*, 2010; O'Connor *et al.*, 2011; Yvon-Durocher *et al.*, 2012; Barneche *et al.*,  
63 2014). This signal of temperature dependence of fundamental metabolic rates emerges over  
64 broad climate gradients and comparisons among independent ecosystems (López-Urrutia *et*  
65 *al.*, 2006; Anderson-Teixeira *et al.*, 2008; Yvon-Durocher *et al.*, 2012) and suggests that  
66 energetic constraints of two highly conserved metabolic processes (oxygenic photosynthesis  
67 and aerobic respiration) may drive responses to environmental temperature change at the  
68 ecosystem, community and population levels (Gillooly *et al.*, 2001; Yvon-Durocher *et al.*,  
69 2010; 2012; Padfield *et al.*, 2016).

70           The metabolic scaling approach to understanding community level responses to  
71 temperature change is challenged by an apparent incongruence between effects predicted by  
72 the temperature-dependence of metabolic functions such as photosynthesis and respiration, on  
73 the one hand, and the often large effects of temperature on species interactions, on the other.  
74 Temperature affects species interactions via population and bioenergetic dynamics, often  
75 producing non-intuitive patterns in species' abundances (Beisner & Peres-Neto, 2009;  
76 O'Connor, 2009; Kordas *et al.*, 2011; Dell *et al.*, 2013; Gilbert *et al.*, 2014). Numerous  
77 warming experiments have shown that warming alters the abundance of interacting  
78 consumers and resources and the strength of top down control of community structure  
79 (Hansson *et al.*, 2012; Shurin *et al.*, 2012). It has even been suggested that MST is not

80 relevant to understanding community change in response to warming (Tilman *et al.*, 2004;  
81 Brauer *et al.*, 2009). Whether demographic or bioenergetic changes at the community scale  
82 are constrained by highly conserved metabolic thermal asymmetries, or represent additional  
83 and potentially confounding effects of temperature on species interactions, remains  
84 unresolved. This lack of resolution implies that we have no accepted framework for  
85 determining which patterns observed in simple mesocosm experiments can be extrapolated to  
86 projections for effects of climate change in nature.

87         If the effects of temperature on consumer-resource interactions are constrained by the  
88 temperature dependence of photosynthesis and respiration (Allen *et al.*, 2005), net ecosystem  
89 effects of warming may be largely independent of demography or species interactions. In  
90 other words, though temperature-dependent trophic interactions can alter density, biomass and  
91 species composition of consumers and primary producers (Beisner *et al.*, 1996; Petchey *et al.*,  
92 1999; O'Connor *et al.*, 2009; Yvon-Durocher *et al.*, 2010; DeLong *et al.*, 2015), there is little  
93 evidence that these community changes cause temperature-dependence of ecosystem-level  
94 oxygen fluxes to deviate from expectations based on the temperature dependence of  
95 photosynthesis and respiration at macroecological scales (López-Urrutia *et al.*, 2006;  
96 Anderson-Teixeira *et al.*, 2008; Yvon-Durocher *et al.*, 2010; 2012). The best evidence to  
97 support the importance of community shifts in modifying ecosystem level responses to  
98 temperature comes from experimental tests of gross primary production of periphyton (in the  
99 absence of grazing) across a thermal gradient in streams (Padfield *et al.*, 2017). These results  
100 showed that species composition shifts can reduce the effect of temperature at the ecosystem  
101 level, compensating for effects of temperature on total productivity. However, we do not yet  
102 have evidence that trophic interactions can play such a role, although local-scale experiments  
103 with a few species suggest that the strength or presence of strong top-down control by  
104 consumers can influence ecosystem level energy flux (Schindler *et al.*, 1997); one likely  
105 pathway, therefore, through which species interactions could modify the effect of temperature

106 on net ecosystem fluxes is if trophic cascades increase in strength at higher temperatures. The  
107 strength of trophic cascades depends on primary production and the magnitude of herbivore  
108 density and/or behavioral responses to predation (Polis *et al.*, 2000; Schmitz *et al.*, 2003), in  
109 addition to the activities and density of predators themselves. Temperature dependent trophic  
110 cascades could therefore disrupt relationships between temperature and ecosystem fluxes  
111 mediated by direct effects of temperature on per capita metabolic rates.

112 Here, we tested whether temperature-dependent top-down control on herbivore and  
113 algal abundance and composition can alter the effect of temperature on ecosystem function  
114 (oxygen flux, phytoplankton standing stock). We experimentally quantified change across a  
115 broad temperature gradient (10 °C) and compared ecosystem and community states across this  
116 gradient (photosynthesis and respiration). The purpose of the broad temperature gradient,  
117 which exceeds forecasted warming over the coming century, is to test the functional response  
118 of warming at the community and ecosystem scales to allow comparison with theoretical  
119 predictions about this relationship. This question gets at the heart of the larger question of  
120 whether energy and material fluxes in ecosystems can be adequately predicted at the local  
121 scale in terms of temperature constraints on fundamental metabolic rates (photosynthesis,  
122 respiration), or whether community dynamics render such metabolic-theory-derived  
123 predictions insufficient to the point of not useful (Brown *et al.*, 2004; Tilman *et al.*, 2004;  
124 Brauer *et al.*, 2009).

125

## 126 **MST framework and hypotheses**

127 We express our hypotheses in terms of testable relationships between temperature and  
128 ecosystem function. One common approach to understanding how temperature affects  
129 communities and ecosystems is to ‘scale up’ from individual physiological processes and  
130 species-specific traits. This approach requires a high burden of information about each  
131 species’ thermal traits, and this need for detailed species-level information prohibits such

132 scaling-up for most ecosystems. The macro-ecological framework of metabolic scaling theory  
133 provides an alternative approach, in which relatively little information (in this case,  
134 temperature dependence of the fundamental and highly conserved metabolic processes  
135 photosynthesis and respiration) is applied to whole systems with many individuals and species  
136 to understand the aggregate functional response to temperature change. In this framework,  
137 whole-organism metabolic rates (e.g., oxygen flux) and related biological functions for  
138 organism  $i$  have been described as following a power-law dependence on body mass and  
139 exponential (Boltzmann-Arrhenius) dependence on temperature (Gillooly *et al.*, 2001; Brown  
140 *et al.*, 2004):

$$141 \quad b_i = b_0 e^{-E_a/kT} m_i^a \quad \text{Eqn 1a}$$

142 in which activation energy ( $E_a$ , in eV) captures temperature (T, in Kelvin) effects on per  
143 capita metabolic response ( $b_i$ ) for individual  $i$ ,  $k$  is the Boltzmann constant (eV/K),  $b_0$  is a  
144 normalization constant independent of body size and temperature,  $m_i$  corresponds to the body  
145 mass of an individual  $i$ , and  $a$  is the allometric scaling factor. This model is a special case of a  
146 more complex equation that allows each species to follow a thermal performance curve, often  
147 described by a modified version of the Sharpe-Schofield equation, in which performance  
148 declines at high temperatures. However, for multi-species systems, the exponential model  
149 performs well (Padfield *et al.*, 2017). This exponential model has been extended to produce a  
150 first-order expectation for the effects of temperature on ecosystem-level rates ( $B_R$ ):

$$151 \quad B_R = b_0^R e^{-E_B/kT} M_B \langle m_B^{\alpha-1} \rangle, \quad \text{Eqn 1b}$$

152 in which  $-E_B$  is the ecosystem-level temperature dependence term for ecosystem rate  $R$ ,  $M_B$  is  
153 total biomass of the community, and  $\langle m_B^{\alpha-1} \rangle$  is a weighted average biomass. Together,  
154  $M_B \langle m_B^{\alpha-1} \rangle$  represents ‘mass-corrected’ biomass, which is a measure of the total metabolic  
155 capacity of the biomass pool in the ecosystem (Yvon-Durocher & Allen, 2012). Here, we  
156 tested the effects of temperature on independent (isolated) experimental ecosystems with  
157 distinct thermal histories, sharing a common initial species pool. Following Eqn 1b, our

158 hypotheses about how the mean temperatures of these independent ecosystems lead to  
159 patterns in ecosystem function across systems can be stated as: for communities closed to  
160 immigration and ecosystem closed to resource inputs other than light:

- 161 *i)* The temperature dependence ( $-E_B = -E_{NPP}$ ) of net primary production ( $B_{NPP} = B_{NPP}$ ) is  
162 predicted by the temperature dependence of photosynthesis ( $E_{PS} = E_{NPP} = -0.32$  eV)  
163 for autotroph-dominated communities,  
164 *ii)* Across systems, the temperature dependence  $-E_{ER}$  of net ecosystem respiration ( $B_{ER}$ )  
165 is predicted by the temperature dependence of respiration ( $E_{ER} = E_R = -0.65$  eV)  
166 *iii)* These temperature dependence coefficients do not vary with food chain length (Fig.  
167 1).

168 These hypotheses that net ecosystem fluxes vary with temperature with the activation energies  
169 associated with per capita metabolic rates (photosynthesis and temperature) assume that  
170 minimal changes occur in total mass-corrected autotrophic and heterotrophic metabolic  
171 biomass over the thermal gradient within each trophic treatment (Yvon-Durocher *et al.*, 2010;  
172 Yvon-Durocher & Allen, 2012; Yvon-Durocher *et al.*, 2012). Past experiments on species  
173 interactions suggest this assumption is not supported, so, following community ecological  
174 theory and empirical evidence, we consider two alternate hypotheses:

- 175 *(iv)* total phytoplankton biomass standing stock ( $M_B$ ) declines with temperature and  
176 this effect varies with food chain length reflecting a temperature-dependent trophic cascade.  
177 *(v)* food chain length and temperature change the relative abundance of species and  
178 trophic groups within each community, but these community changes do not affect net  
179 ecosystem fluxes.

180

## 181 **Methods**

### 182 **Experimental Design**

183 We tested our hypotheses by manipulating temperature and food chain length in 30



184 independent aquatic ecosystems (Fig. 1A-B). For each food chain length (algae-only, algae-  
185 grazer or algae-grazer-predator), we maintained ecosystems at distinct temperatures in a  
186 regression design with mean temperatures ranging from ~19 °C to ~31 °C (Fig. 1C). The  
187 regression design allowed us to estimate slopes ( $E_A$ , Eqn 1b) of response variables along a  
188 continuous temperature gradient (Cottingham *et al.*, 2005; Gotelli & Ellison, 2013) for  
189 different trophic structures by log-transforming equation 1b and fitting linear models to the  
190 continuous temperature gradient. The regression design was the right choice to compare  
191 activation energies over a broad range of the x-variable (temperature); an important test of  
192 thermal functional responses that is not possible with designs with only 2 or even three  
193 temperature levels. The three-trophic-level treatment included predators that were not a  
194 dynamic part of the system – they did not reproduce and their several month life span did not  
195 allow for demographic responses. Therefore, inferences about trophic structure are restricted  
196 to systems with dynamics in the primary producers and primary consumers, with fixed  
197 predation-related mortality imposed by a third trophic level.

198         We designed an experiment to test these hypotheses by comparing replicate  
199 communities across a thermal gradient. Each ecosystem experienced the same conditions  
200 (weather, seasonal variation), and differed in the average temperature of the ecosystem (Fig.  
201 1C). Our experiment was not designed to track and measure community dynamics over time –  
202 we did not sample frequently enough for a robust test of temporal dynamics. Therefore, we  
203 aim to test our hypotheses and draw inferences based on a comparison of 30 independent  
204 ecosystems along the thermal gradient, rather than by detailed analysis of their temporal  
205 trajectories. Considerations of how ecosystems responded to temperature variation over time  
206 in this experiment would be confounded by temporal changes in community structure and  
207 successional dynamics. We focus here on how the structure and function of ecosystems varies  
208 with average temperature. Our approach thus uses a controlled experiment to mirror the

209 application of temperature scaling models to whole ecosystem change over broad spatial  
210 scales in comparative studies (López-Urrutia *et al.*, 2006; Anderson-Teixeira *et al.*, 2008;  
211 Yvon-Durocher *et al.*, 2012).

212

### 213 **Experimental Food Webs**

214 We assembled freshwater food webs in 30 outdoor mesocosms (370 L tanks) at the University  
215 of British Columbia, Vancouver, Canada (49°14'52" N, 132°13'57" W). From June 26<sup>th</sup> to  
216 August 28<sup>th</sup> 2012, we experimentally manipulated temperature (10 levels) and food chain  
217 length (3 levels: algae-only, algae + zooplankton, and algae + zooplankton + predator food  
218 chains, Fig. 1A-B). Initially (experiment day 7) mesocosms were inoculated with pondwater  
219 (1L) containing living algae, collected and filtered through a 64- $\mu$ m sieve to remove  
220 zooplankton and larvae. Three days later, we collected zooplankton at Trout Lake,  
221 Vancouver, B.C. (49°15'23" N, 123°03'44" W), with a vertical tow net (64- $\mu$ m mesh).  
222 Zooplankton were mixed in buckets to homogenize species composition, acclimated  
223 overnight to mesocosm temperatures and dead organisms removed. Initial experimental  
224 communities consisted of 25 phytoplankton taxa (S1) and predominantly 2 zooplankton taxa  
225 (the cladoceran *Daphnia* sp., and calanoid copepod *Eurytemora* sp.), though a few cyclopoid  
226 copepods were included. To ensure colonization of grazing zooplankton, two individuals of  
227 *Daphnia* sp. and ten *Eurytemora* sp. were added to each consumer treatment (all 2- and 3-TL  
228 ecosystems). We introduced 2 individual notonectid predators (*Notonecta undulata*) on July  
229 3<sup>rd</sup>, 2012 (experiment day 7) to 10 3-TL tanks. Notonectids generate trophic cascades by  
230 suppressing zooplankton (Mcardle & Lawton, 1979). Notonectids did not reproduce during  
231 the experiment, and we replaced dead notonectids during the experiment with similar-sized  
232 individuals from the same source population.

233

234 **Figure 1: A)** Experimental food web composition and **B)** experimental design for three  
235 trophic level systems. Food chains contained Notonectid predators (N), zooplankton (Z)  
236 grazers *Eurytemora* sp. and *Daphnia* sp., and phytoplankton (P). **C)** Ecosystem temperature  
237 and food chain length were manipulated in a regression experimental design with 10  
238 independent systems spanning a 10 °C temperature gradient. The temperature gradient was  
239 repeated for each food chain length: 1-, 2- and 3-trophic levels. The experiment occurred over  
240 one to many generations of grazers and phytoplankton, but within one (adult) life stage of  
241 notonectid predators.

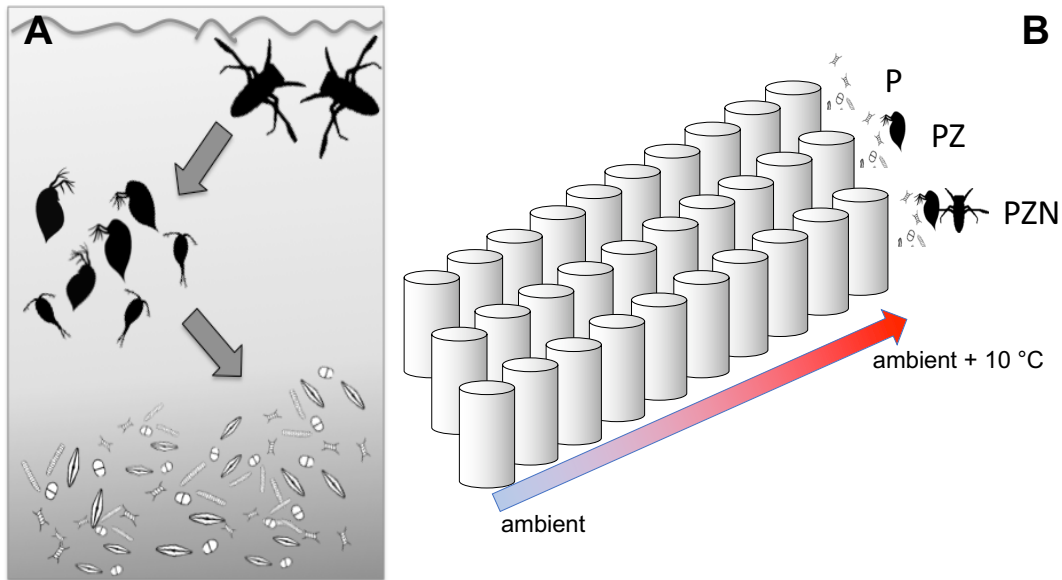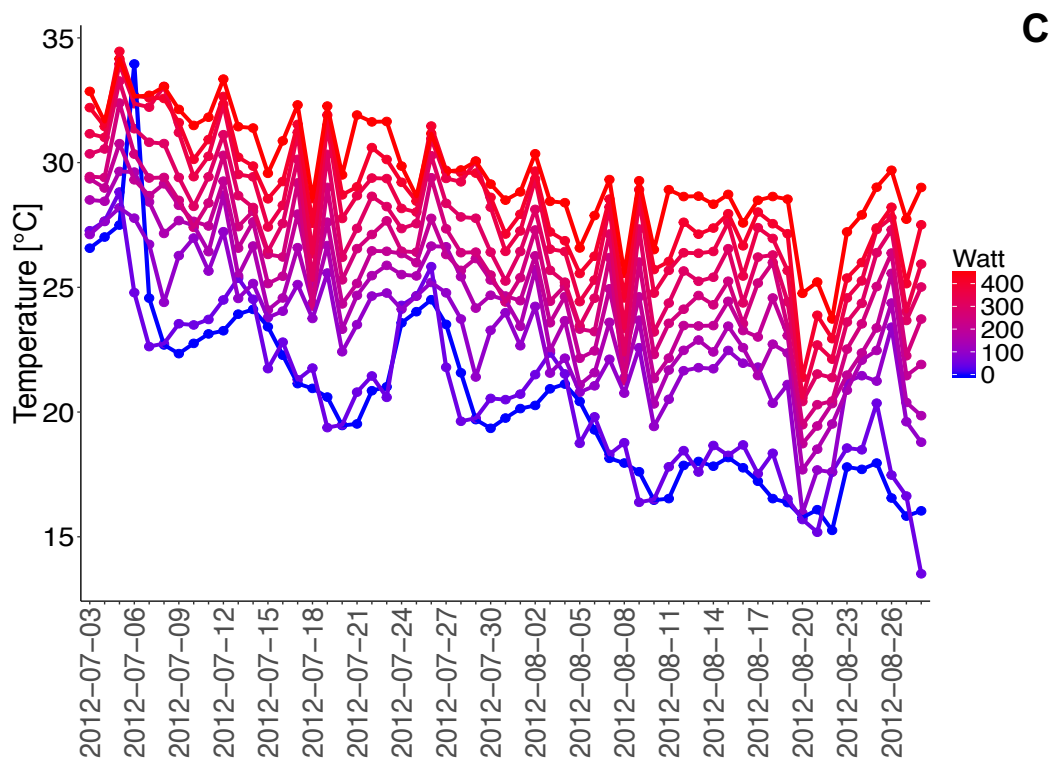

242

243

#### 244 **Abiotic and biotic conditions**

245 Mesocosms were filled with municipal water and left for one week to allow chlorine to  
246 evaporate before organisms were introduced (Kratina *et al.*, 2012). We added 160- $\mu\text{g NaNO}_3$   
247  $\text{L}^{-1}$  and 10- $\mu\text{g KH}_2\text{PO}_4 \text{L}^{-1}$  to each tank (16:1 N:P) on experiment day 7. Water was heated  
248 with submersible aquarium heaters (50, 100, 150, 200, 250, 300, 350, 400, 450 Watt) to

249 increase temperature above ambient daily temperature. Temperature differences among tanks  
250 were consistent throughout the course of the experiment (Fig. 1C). Mesocosms were covered  
251 with two layers of window screen to minimize colonization by other invertebrates. Water  
252 levels were maintained by natural precipitation and weekly additions to maintain volume. The  
253 spatially randomized assignment of temperature and trophic treatments eliminated systematic  
254 variation in negligible allochthonous carbon inputs.

255

### 256 **Plankton Sampling and Analysis**

257 Weekly, we sampled phytoplankton, chlorophyll *a*, zooplankton, and oxygen  
258 concentrations. We sampled algal assemblages in 100-mL water samples collected from ~40-  
259 cm below the surface. We counted and identified cells using the Utermöhl sedimentation  
260 method (Utermöhl, 1958) and estimated chlorophyll *a* concentration using a Trilogy  
261 fluorometer (Turner Designs). Phytoplankton were identified and counted to species or taxon  
262 level by inverted microscopy. We collected depth-integrated zooplankton samples (10 L water  
263 filtered through a 64- $\mu\text{m}$ ); the filtered water returned to mesocosms. Plankton was fixed with  
264 Lugol's iodine solution (5%). Under 10x magnification, we counted and identified  
265 zooplankton to genus, measured standard length for all development stages in week 8. We  
266 measured oxygen concentrations using YSI-85 oxygen sensor (Yellow Springs Instruments,  
267 Yellow Springs, Ohio, USA).

268

### 269 **Estimation of biomass and fluxes**

270 We estimated carbon biomass of phytoplankton ( $M_P$ ) by converting chlorophyll *a*  
271 concentrations using 0.05  $\mu\text{g}$  chlorophyll *a* /  $\mu\text{g}$  C at 295K, and a temperature dependence of  
272 this ratio of  $-0.001\text{ }^\circ\text{C}^{-1}$  (Geider *et al.*, 1997). For zooplankton (grazers and notonectids), we  
273 used length-weight ratios to convert length to carbon (S2). We did not estimate microbial or  
274 periphyton biomass.

275 We estimated whole ecosystem oxygen fluxes using the dissolved oxygen (DO)  
276 change technique (Marzolf *et al.*, 1994), correcting for temperature effects on oxygen  
277 saturation state. The change in DO ( $\Delta DO$ ) was measured over 24 hours (dawn, dusk and the  
278 following dawn) according to forecasted sunrise and sunset on measurement days (Hanson *et*  
279 *al.*, 2003). We assumed sunrise represented minimum daily  $O_2$  concentration, after which all  
280 subsequent values were greater (Yvon-Durocher *et al.*, 2010; Kratina *et al.*, 2012; Yvon-  
281 Durocher & Allen, 2012), and we assumed that sunset coincided with maximum  $O_2$   
282 concentration (DO) after which all subsequent values were lower. Physical oxygen flux ( $mg$   
283  $m^{-2} d^{-1}$ ) with the atmosphere was calculated as follows:  $O_{2flux} = \exp(O_{2water} - O_{2sat}) * \ln(T +$   
284  $45.93) - e$ , where  $O_{2water}$  is the  $O_2$  concentration of water,  $O_{2sat}$  is the concentration the water  
285 would have if it were at equilibrium with the atmosphere (390- $\mu atm$ ),  $T$  is the temperature  
286 correction for  $O_2$  saturation,  $e$  is the pressure coefficient for elevation of study area (here  
287 0.03) (Atwood *et al.*, 2015). We estimated NPP and ER, in  $\mu mol O_2 L^{-1} d^{-1}$ , as follows:

$$288 \quad NPP = \left[ \frac{(O_{2.dusk} - O_{2.dawn}) \times 1000}{32} \right] d^{-1} \quad \text{Eqn 3a}$$

$$289 \quad ER = \left[ \frac{24}{(t_{dawn} - t_{dusk})} \right] \times \left[ \frac{((O_{2.dawn2} - O_{2.dusk}) * 1000)}{32} \right] \quad \text{Eqn 3b}$$

290 in which  $O_2$  is dissolved oxygen ( $mg L^{-1}$ ),  $32 \mu g O_2 / \mu mol O_2$ , and measurement time  $t_i$ .

291 We processed and analysed the full set of response variables for weeks 4 – 9, except  
292 for zooplankton size, excluding transient bloom conditions (weeks 1-3) that were not the  
293 focus of this study.

294

## 295 **Statistical Analysis**

296 We used linear mixed effects models to describe relationships between ecosystem and  
297 community response variables (Y) and temperature, a continuous predictor in our  
298 experimental design. While temperature varied over time in the experimental ecosystems, so

299 did other conditions including ecological succession and weather. Our hypotheses are about  
 300 how different average temperature conditions affect ecosystem functions, given normal  
 301 environmental variation within ecosystems. Therefore, we modelled among-system responses  
 302 to temperature, while also modelling within-system variation associated with temperature, and  
 303 other conditions, over time. To distinguish within-tank variation from among-tank effects of  
 304 temperature, we used a within-subject mean centering approach that decomposes the  
 305 environmental effects into those associated with the average environment experienced over  
 306 the experimental duration ('between-tank' effect), versus deviations of the environment in a  
 307 given temperature treatment ('within-tank temperature' effect) (van de Pol & Wright, 2009).

308 We first tested a random effects model, in which the response variable (Y) for each  
 309 ecosystem  $j$  in week  $i$  was modelled as a continuous response to variation in inverted  
 310 ecosystem temperature ( $1/kT_{ij}$ ) and trophic level ( $TL_j$ )

$$\begin{aligned}
 \ln(Y_{ij}) = & \beta_{0,j(i)} + \beta_1 \left( \frac{1}{kT_{ij}} - \frac{1}{k\bar{T}_j} \right) + \beta_2 \frac{1}{k\bar{T}_j} + \beta_3 * \left( \frac{1}{kT_{ij}} - \frac{1}{k\bar{T}_j} \right) * \left( \frac{1}{k\bar{T}_j} \right) \\
 311 & + \beta_4 * TL_j + \beta_5 * \left( \frac{1}{k\bar{T}_j} \right) * TL_j + \beta_6 * \left( \frac{1}{kT_{ij}} - \frac{1}{k\bar{T}_j} \right) * TL_j \\
 & + u_j + e_{ij}
 \end{aligned}
 \tag{Eqn 4}$$

312 where  $\beta_{0,j(i)}$  represents an intercept allowed to vary randomly among tanks. The between-  
 313 ecosystem effect of temperature ( $\beta_2$ ) is estimated as the slope of  $\ln(Y_{ij})$  on the mean value of  
 314 inverse temperature for ecosystem  $j$   $\left( \frac{1}{k\bar{T}_j} \right)$  over all weeks. The within-subject ( $\beta_1$ ) effect of  
 315 temperature variation over time is estimated as the slope of  $\ln(Y_{ij})$  vs the deviation of the  
 316 mean temperature each week  $\left( \frac{1}{k\bar{T}_j} \right)$  relative to  $\left( \frac{1}{k\bar{T}_j} \right)$ . We also tested for an interaction  
 317 between within-treatment temporal variation in temperature and the experimental temperature  
 318 treatment ( $\beta_3$ ). To test our hypothesis that trophic structure modifies the effect of temperature  
 319 on ecosystem function, we included the terms ( $\beta_6$ ) and ( $\beta_5$ ). We tested for effects of trophic  
 320 structure on ecosystem function, independent of temperature, with the term ( $\beta_4$ ). Response

321 variables were ln-transformed prior to analyses to achieve normal distributions and to  
322 linearize temperature effects for analysis and comparison with MST predictions (Eqn 1b).  
323 When modelling we centered temperature treatment ( $1/kT_j$ ) on the grand mean temperature  $\bar{T}$   
324 (not shown in Eqn 4) to reduce correlations between slope and intercept terms. For each  
325 response variable, we used ANOVA to determine the need for the random effect of tank by  
326 first comparing the full model (Eqn 4) with the same model without the random effect.

327 To test our hypothesis that food chain length (1, 2 or 3 trophic levels) modifies the  
328 estimated temperature dependence ( $E_a$ , Eqn 1b) of oxygen flux and biomass, we first  
329 identified the best model for each response variable. We compared models with and without  
330 trophic level terms ( $\beta_4$ ) and interactions between  $TL$  and temperature ( $\beta_5$ , and  $\beta_6$ ). We also  
331 tested models without each of the temperature terms. In total, after testing for the random  
332 effects structure, the model set included 9 models (Table 1). We ranked models using  
333 Akaike's Information Criterion ( $AIC_C$ ) weights, and compared models using likelihood ratio  
334 tests (LRT). When two or models were considered comparable or equivalent ( $\delta AIC < 2$ ) we  
335 reported all models meeting this criterion and report averaged coefficients. We estimated  
336 activation energy and intercepts for among tank responses to temperatures by first rearranging  
337 Eqn 4 to group coefficients by temperature term (Eqn 4a):

$$338 \ln(Y_{ij}) = \beta_{0,j(i)} + \left( \beta_1 + \beta_3 * \left( \frac{1}{k\bar{T}_j} \right) + \beta_6 * TL_j \right) \left( \frac{1}{kT_{ij}} - \frac{1}{k\bar{T}_j} \right) + \left( \beta_2 + \beta_5 * TL_j \right) * \left( \frac{1}{k\bar{T}_j} \right) \\ + \beta_4 * TL_j + u_j + e_{ij}$$

339 We estimated confidence intervals for composite terms following (Figueiras *et al.*, 1998).  
340 To analyse the effects of time and temperature on the phytoplankton community composition,  
341 we performed a Non-metric multidimensional scaling (NMDS). It is a rank-based ordination  
342 technique which is robust towards data sets where abundances are highly diverse among taxa.  
343 While NMDS does not allow assessing the effects of environmental gradients, it enables the  
344 detection of temporal patterns in the data. We used the metaMDS function in R to measure



345 the Bray-Curtis community dissimilarities. Species abundances were square root transformed.  
 346 We used R statistical software (R v. 1.0.44 R Developmental Core Team 2006) with packages  
 347 MuMIn, nlme, plyr, tidyverse, broom, reshape2, lubridate, hms and zoo.  
 348  
 349 **Table 1:** Candidate models. The full model, as written in Eqn 4 in the main text, is  
 350 reproduced here for convenience. The table indicates with an ‘x’ which terms were included  
 351 in each candidate model.

$$\ln(Y_{ij}) = \beta_{0.j(i)} + \beta_1 \left( \frac{1}{kT_{ij}} - \frac{1}{k\bar{T}_j} \right) + \beta_2 \frac{1}{k\bar{T}_j} + \beta_3 * \left( \frac{1}{kT_{ij}} - \frac{1}{k\bar{T}_j} \right) * \left( \frac{1}{k\bar{T}_j} \right) + \beta_4 * TL_j + \beta_5 * \left( \frac{1}{k\bar{T}_j} \right) * TL_j + \beta_6 * \left( \frac{1}{kT_{ij}} - \frac{1}{k\bar{T}_j} \right) * TL_j + u_j + e_{ij}$$

|        | Model parameter  |           |           |           |           |           |           |         |
|--------|------------------|-----------|-----------|-----------|-----------|-----------|-----------|---------|
| Mod.   | $\beta_{0.j(i)}$ | $\beta_1$ | $\beta_2$ | $\beta_3$ | $\beta_4$ | $\beta_5$ | $\beta_6$ | $\mu_j$ |
| Full.r | x                | x         | x         | x         | x         | x         | x         | x       |
| Full   | x                | x         | x         | x         | x         | x         | x         |         |
| 8      | x                | x         | x         |           | x         | x         | x         |         |
| 7      | x                | x         | x         |           | x         | x         |           |         |
| 6      | x                | x         |           |           | x         |           | x         |         |
| 5      | x                | x         |           |           | x         |           |           |         |
| 4      | x                | x         | x         | x         |           |           |           |         |
| 3      | x                | x         | x         |           |           |           |           |         |
| 2      | x                | x         |           |           |           |           |           |         |
| 1      | x                |           |           |           | x         |           |           |         |
| 0      | x                |           |           |           |           |           |           |         |

353

354

355

## 356 **Results**

### 357 *Temperature dependence of top-down control (hypotheses iv - v)*

358 We first present results for hypotheses iv-v, because they demonstrate top-down  
359 control that was temperature dependent in our ecosystems. Total ecosystem oxygen fluxes  
360 varied with food chain length, after controlling for temperature, reflecting top down control of  
361 ecosystem functions, as indicated by significant variation in intercept terms and the  $\beta_4$  term in  
362 the highest ranking models for NPP and ER (Fig. 2, Table 2). Net oxygen fluxes in systems  
363 with predators tended to be more similar to systems without consumers (Fig. 2A-F),  
364 indicating that strong grazer effects on oxygen fluxes were minimized in the presence of  
365 predators by top down control.

366 Predator-grazer-algae food chains had higher phytoplankton biomass ( $M_P$ ) (Fig. 2G-I)  
367 than systems with grazers but no predators, similar to algae-only food chains. This classic  
368 trophic cascade became stronger as temperature increased (Fig. 2G-I, Table 1). By week 8,  
369 predators had shifted composition of zooplankton to less effective grazers (from *Daphnia* sp.  
370 to copepods, Fig. 3B, S3), though there was no clear effect of predators on zooplankton  
371 density in week 8. The proportion of inedible phytoplankton taxa (cyanobacteria) increased  
372 over time at higher temperatures, but this change was unaffected by food chain length (Fig.  
373 4).

374 Phytoplankton biomass ( $M_P$ ) declined with increasing temperature (Fig. 2G-I, Table  
375 2). Across-system effects of temperature were steepest in 2-TL systems with zooplankton  
376 grazers and no predators, with a 30-fold decline as temperature increased across systems (Fig.  
377 2, Table 3). The trophic cascade strengthened with temperature, and we therefore do not reject  
378 hypothesis iv. For ecosystem-level phytoplankton biomass  $\ln(M_P)$ , a model with random  
379 effect for tank (Full.R) performed better than the model without random effects (Full) (Full vs

380 Full.R:  $p = < 0.001$ , S4), and subsequent analyses were done with random effects models.

381 Within-ecosystem trends in biomass associated with temperature differed starkly from effects  
382 of temperature among ecosystems (Fig. 2). Over time, higher temperatures were associated  
383 with higher phytoplankton standing stocks within systems, though interpretation of the  
384 temperature effect is confounded by the decline in temperature over time likely associated  
385 with other temporal changes.

386

387 **Figure 2:** Net ecosystem oxygen flux, phytoplankton standing stock, and estimated activation  
388 energies varied over the experimental thermal gradient. **A-C)** Net primary production (NPP),  
389 **D-F)** net ecosystem respiration (ER) and **G-I)** phytoplankton standing stocks ( $M_B$ ) were  
390 estimated once per week (for 6 weeks post bloom) in each replicate ecosystem ( $n = 30$ ). For  
391 each ecosystem (shade of grey), 6 points are shown, one point for each week (symbols). Bold  
392 lines indicate hierarchical regressions fit to among-group variation in temperature, after taking  
393 into account within-group variation temperature effects (light lines)(Table 2). Temperatures  
394 within tanks declined over time (Fig. 1C). Activation energies and confidence intervals given  
395 in Table 3.

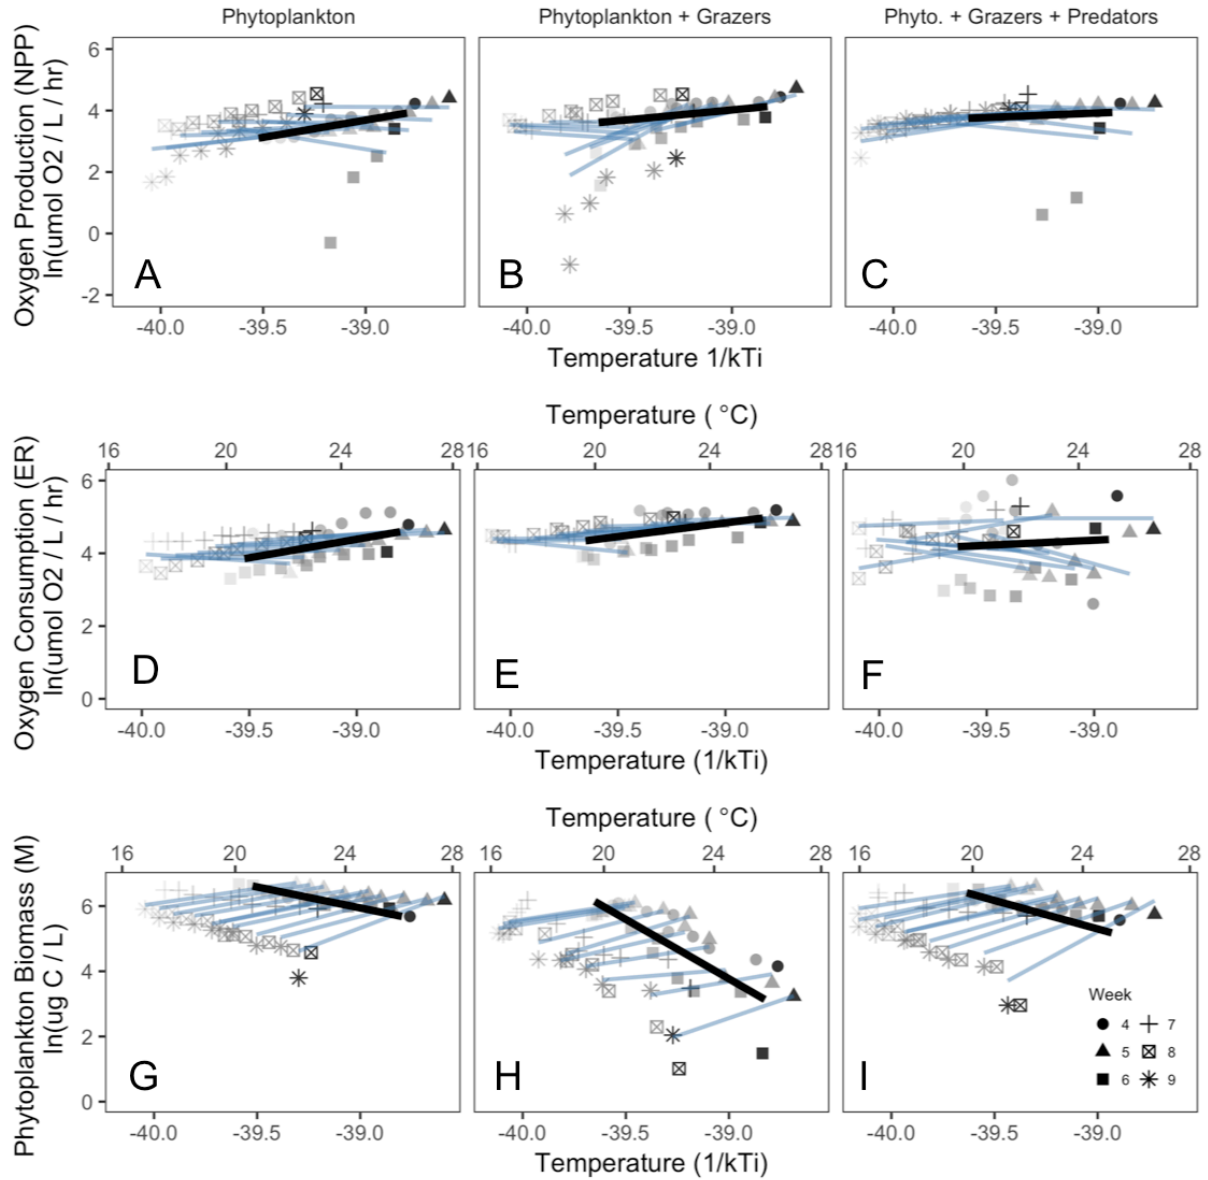

396

397

398 **Table 2:** Model comparisons for effects of temperature and food chain length on biological  
 399 responses based on AIC weight ( $w$ ) and  $\delta\text{AIC}$  values. Response variables are modelled as in  
 400 Equation 4, as functions of temperature  $T_{ij}$  for each tank  $j$  on week  $i$  relative to the mean  
 401 temperature  $T_{Mj}$  for tank  $j$  over all weeks ( $T$  in Kelvin), and food chain length (TL). Only  
 402 models ranking in the top set ( $\delta\text{AIC} < 2$ ) are shown.

| Model                          | $w$ | df | $\delta$ | loglik |
|--------------------------------|-----|----|----------|--------|
| Net Primary Productivity (NPP) |     |    |          |        |

|                                      |                                                                                                                                                                                                                                                                                                 |      |    |      |         |
|--------------------------------------|-------------------------------------------------------------------------------------------------------------------------------------------------------------------------------------------------------------------------------------------------------------------------------------------------|------|----|------|---------|
| 8                                    | $\ln(Y_{ij}) = \beta_{0.j(i)} + \beta_1 \left( \frac{1}{kT_{ij}} - \frac{1}{k\bar{T}_j} \right) + \beta_2 \frac{1}{k\bar{T}_j}$ $+ \beta_4 * TL_j + \beta_5 * \left( \frac{1}{k\bar{T}_j} \right) * TL_j + \beta_6 * \left( \frac{1}{kT_{ij}} - \frac{1}{k\bar{T}_j} \right) * TL_j$ $+ e_{ij}$ | 0.45 | 10 | 0.00 | -189.77 |
| 3                                    | $\ln(Y_{ij}) = \beta_{0.j(i)} + \beta_1 \left( \frac{1}{kT_{ij}} - \frac{1}{k\bar{T}_j} \right) + \beta_2 \frac{1}{k\bar{T}_j} + e_{ij}$                                                                                                                                                        | 0.18 | 4  | 1.82 | -197.28 |
| <b>Ecosystem Respiration (ER)</b>    |                                                                                                                                                                                                                                                                                                 |      |    |      |         |
| 7                                    | $\ln(Y_{ij}) = \beta_{0.j(i)} + \beta_1 \left( \frac{1}{kT_{ij}} - \frac{1}{k\bar{T}_j} \right) + \beta_2 \frac{1}{k\bar{T}_j} * \left( \frac{1}{k\bar{T}_j} \right)$ $+ \beta_4 * TL_j + \beta_5 * \left( \frac{1}{k\bar{T}_j} \right) * TL_j + e_{ij}$                                        | 0.74 | 8  | 0.00 | -116.10 |
| <b>Phytoplankton Biomass (Mp)</b>    |                                                                                                                                                                                                                                                                                                 |      |    |      |         |
| 7                                    | $\ln(Y_{ij}) = \beta_{0.j(i)} + \beta_1 \left( \frac{1}{kT_{ij}} - \frac{1}{k\bar{T}_j} \right) + \beta_2 \frac{1}{k\bar{T}_j} * \left( \frac{1}{k\bar{T}_j} \right)$ $+ \beta_4 * TL_j + \beta_5 * \left( \frac{1}{k\bar{T}_j} \right) * TL_j + u_j + e_{ij}$                                  | 0.73 | 9  | 0.00 | -120.08 |
| <b>Average Zooplankton body size</b> |                                                                                                                                                                                                                                                                                                 |      |    |      |         |
| 6                                    | $\beta_0 + \beta_4 * (TL) * \text{taxon} + \varepsilon_j$                                                                                                                                                                                                                                       | 0.62 | 5  | 0.00 | -64.38  |
| 8                                    | $\beta_0 + \beta_2 * (T_{Mj}) + \beta_4 * (TL) * \text{taxon} + \varepsilon_j$                                                                                                                                                                                                                  | 0.25 | 6  | 1.82 | -64.25  |
| <b>Zooplankton density</b>           |                                                                                                                                                                                                                                                                                                 |      |    |      |         |
| 5                                    | $\beta_0 + \beta_2 * (T_{Mj}) + \varepsilon_j$                                                                                                                                                                                                                                                  | 0.79 | 3  | 0.00 | -10.80  |

403

404 **Figure 3:** In the 8<sup>th</sup> week of the experiment, zooplankton density declined with increasing  
405 temperature (A) but did not differ between ecosystems with (triangles) and without (circles)  
406 notonectid predators (Table 2). Daphnia size declined in the presence of predators, but  
407 copepod size did not, and there was no effect of temperature on body size in week 8 (Table 2).

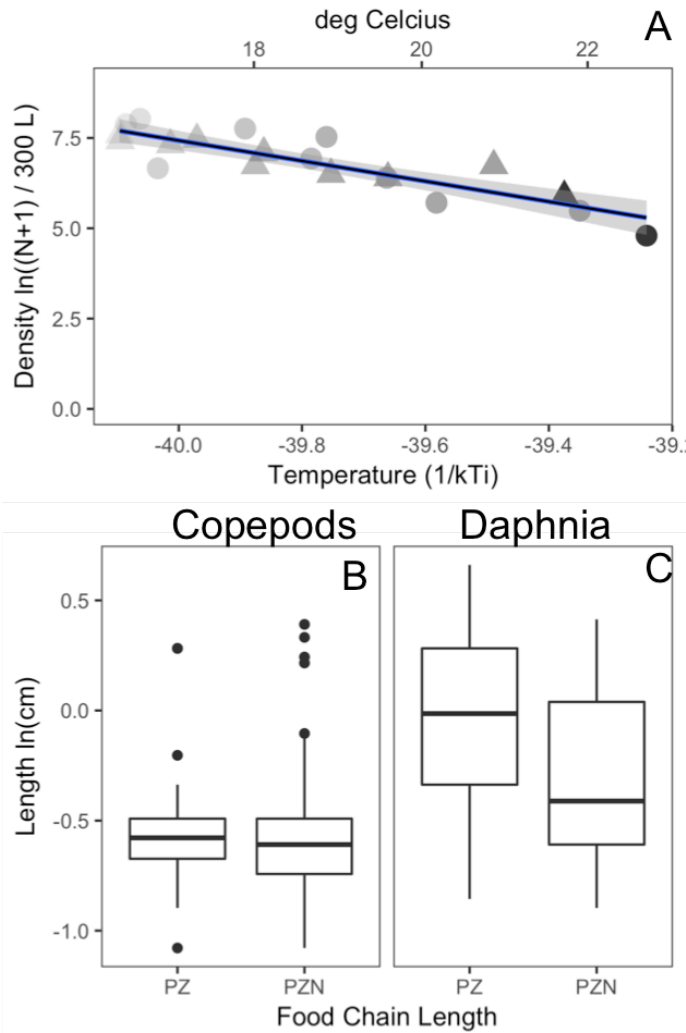

408

409

410

411

412 **Figure 4.** Temperature and food chain length shifted algal community composition in  
413 experimental ecosystems. Each point represents one ecosystem observed at one time, and  
414 lighter shades are communities at higher temperatures as indicated by the inset legend with  
415 mean temperature for each tank over the experimental period. Tanks sharing the same  
416 temperature treatment are indicated by an ellipse. Mesocosm phytoplankton species diversity  
417 mostly affected by time are the ones closest to the axes of the graph in the NMDS plot.

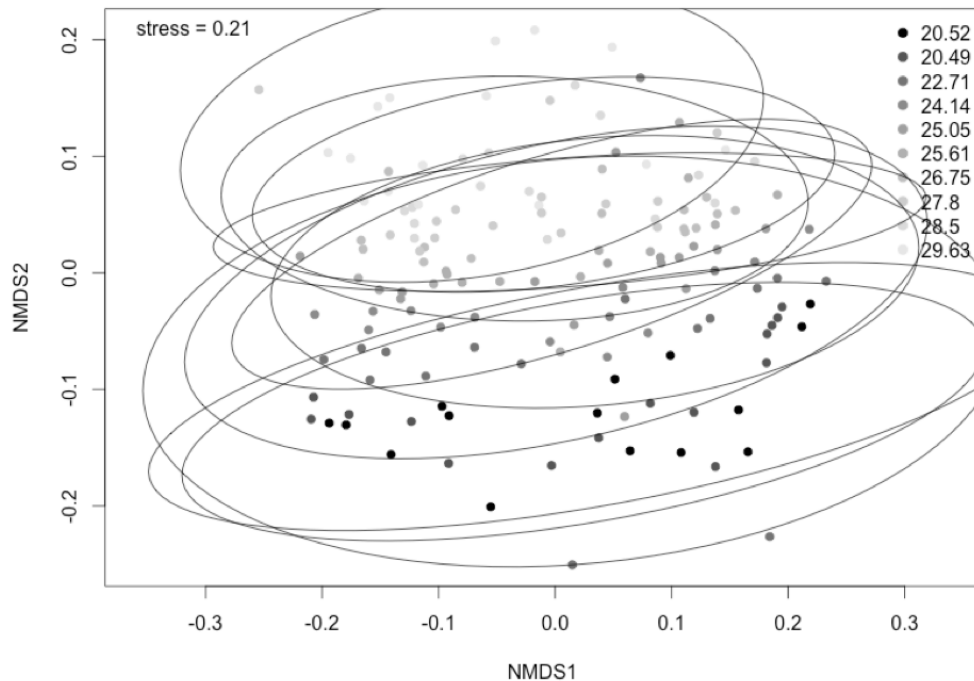

418

419

420 ***Trophic structure influenced temperature dependent ecosystem function (hypotheses i - iii)***

421 Our results suggest that trophic structure alters the effect of temperature on ecosystem-  
422 level oxygen flux. Across the experimental temperature gradient, net ecosystem oxygen  
423 production (NPP) increased with temperature (bold lines, Fig. 3A-C), and varied with trophic  
424 structure (Fig. 2A-C, Tables 2-3). Mean temperature dependence of NPP across ecosystems  
425 was not statistically different than the expected  $E_{NPP} = -0.32$  eV (consistent with hypothesis *i*),  
426 though the confidence intervals are wide enough to include 0 for ecosystems with consumers,  
427 and also the activation energy of respiration (-0.65 eV) (Table 3). In the absence of  
428 zooplankton the estimated across-system temperature dependence was stronger than expected:  
429  $E_{NPP} = -1.12$  eV ( $\pm 1.02$ ) (Table 3). For ecosystem-level  $\ln(\text{NPP})$ , a model without a random  
430 effect for tank (Full) performed just as well as a model with the random effect (Full.R) (Full  
431 vs Full.R:  $p = 0.999$ , S5), and subsequent analyses were done with fixed effects models. The  
432 best model included an interaction between trophic level and average temperature (Table 2),  
433 suggesting that trophic structure alters across-system temperature dependence of NPP.

434 However, the difference in the coefficients of temperature dependence among trophic  
 435 treatments is not well resolved, due to the broad confidence intervals (Table 3).

436 Trophic structure also altered the across-system temperature dependence of ER,  
 437 weakening the effect of temperature when food chains were longer. Thus we reject hypothesis  
 438 *v*. Net ecosystem respiration (ER) increased with temperature across ecosystems, consistent  
 439 with the predicted  $E_R = -0.65$  eV (consistent with hypothesis *ii*, Fig. 2D-F, Table 2), and with  
 440 confidence intervals that do not include the proposed temperature dependence of NPP for  
 441 short and long food chain systems (Fig. 2, Table 2). For tank-level  $\ln(\text{ER})$ , a model without a  
 442 random effect for tank (Full) performed just as well as a model with the random effect  
 443 (Full.R) (Full vs Full.R:  $p = 0.859$ , S5), and subsequent analyses were done with fixed effects  
 444 models.

445 Within ecosystems, effects of temperature variation over time on oxygen fluxes were  
 446 weaker than or comparable to among-system effects (Fig. 2), and did not depend on  
 447 temperature treatment or trophic level (Table 2).

448

449 **Table 3. Estimates and formulae for activation energy terms.**

| Resp. | Model    | Trophic Structure | Slope ( $E_a$ )           | Slope ( $E_a$ ) est. |
|-------|----------|-------------------|---------------------------|----------------------|
| NPP   | Avg(8,3) | P                 | $\beta_2$                 | -1.12 (-2.15, -0.10) |
|       |          | PZ                | $\beta_2 + \beta_{5,PZ}$  | -0.63 (-1.53, 0.27)  |
|       |          | PZN               | $\beta_2 + \beta_{5,PZN}$ | -0.27 (-1.29, 0.74)  |
| ER    | 7        | P                 | $\beta_2$                 | -1.02 (-1.67, -0.36) |
|       |          | PZ                | $\beta_2 + \beta_{5,PZ}$  | -0.76 (-1.31, -0.20) |
|       |          | PZN               | $\beta_2 + \beta_{5,PZN}$ | -0.28 (-0.93, 0.37)  |
| PB    | 7        | P                 | $\beta_2$                 | 1.23 (0.76, 1.81)    |



|      |          |     |                           |                   |
|------|----------|-----|---------------------------|-------------------|
|      |          | PZ  | $\beta_2 + \beta_{5.PZ}$  | 3.64 (3.21, 4.09) |
|      |          | PZN | $\beta_2 + \beta_{5.PZN}$ | 1.75 (1.22, 2.27) |
| Size | Avg(6,8) | PZ  | $\beta_2$                 | 2.81 (2.03, 3.61) |
|      |          | PZN | $\beta_2$                 | 2.81 (2.03, 3.61) |

450

## 451 Discussion

452 The growing literature of experimental tests of how warming affects interacting  
 453 species aims to reduce uncertainty in projected ecological changes associated with climate  
 454 change. Warming experiments have shown a wide variety of consequences for species  
 455 interactions, from shifts in community composition, strengthening top-down control, and  
 456 shifts in body size. However, how these responses to warming, in short-term experiments  
 457 designed to test specific hypothesis, can be best related to projections for climate change  
 458 impacts over broad scales of space, time and complexity is not always clear. One way to  
 459 facilitate such projections is for experiments to test functional responses of ecological  
 460 processes along thermal gradients, as we have done here, and to test for sensitivity of  
 461 functional responses to ecological conditions. Empirically estimated functional responses that  
 462 can be incorporated into theoretical models can support projections of change based on  
 463 system dynamics, rather than direct extrapolation from experimental conditions, and are likely  
 464 to prove the most useful in understanding ecological change with climate change (Cuddington  
 465 *et al.*, 2013).

466 Here, we quantified the functional response of net ecosystem fluxes of oxygen and  
 467 community structure to temperature, over a broad thermal gradient and in the context of  
 468 metabolic scaling theory. Oxygen fluxes indicate the productivity of an ecosystem and are  
 469 directly proportional to carbon fluxes and the potential of an ecosystem to be a carbon source  
 470 or sink (López-Urrutia *et al.*, 2006). We found that increasing ecosystem average  
 471 temperatures increased NPP and ER at the community scale, and these effects varied with

472 trophic structure of the local community. The exponential increase in NPP and ER with  
473 warming was greatest for communities without consumers (algae only), and least pronounced  
474 in communities with grazers and top predators. These results suggest that models relying on  
475 functional responses of net ecosystem oxygen or carbon fluxes to temperature might be more  
476 accurate when they can include coarse aspects of trophic structure such as the presence of  
477 grazers and predators. Further, these results suggest that simplification of trophic structure  
478 with environmental change (Estes *et al.*, 2011) could increase the responses of net ecosystem  
479 fluxes to temperature changes.

480         The temperature gradient also affected key aspects of community structure across  
481 independent ecosystems, and the response of phytoplankton biomass to temperature was  
482 much greater than the effect of temperature on net ecosystem fluxes. These community-level  
483 shifts associated with temperature are consistent with what other experimental studies have  
484 reported over a much smaller range of temperatures (Beisner *et al.*, 1996; Hansson *et al.*,  
485 2012; Shurin *et al.*, 2012). However, the large community changes over a thermal gradient did  
486 not directly predict the effects of temperature on local ecosystem fluxes based on comparisons  
487 across ecosystems and metabolic scaling models –variation in fluxes was several orders of  
488 magnitude less over the thermal gradient than the variance in phytoplankton biomass. This  
489 difference is likely in part attributable to changes in per capita phytoplankton productivity  
490 associated with species composition shifts and temperature, and could also be attributed to  
491 shifts in phytoplankton abundance relative to benthic algae (which we did not quantify).

492         We had hypothesized that ecosystem level NPP and ER would be predicted directly by  
493 the temperature dependences of photosynthesis and respiration, and insensitive to trophic  
494 structure, as they appear to be in many macro-ecological scale analyses (López-Urrutia *et al.*,  
495 2006). However, we found that the temperature dependences varied with trophic structure  
496 such that only the grazer-only food chain ecosystems were consistent with temperature  
497 dependence of the underlying metabolic processes. Deviations from these expected activation

498 energies could be explained by temperature driven shifts in total biomass. Ecosystem NPP  
499 reflected both changes in per capita photosynthesis as well as large changes in mass corrected  
500 metabolic biomass (Yvon-Durocher & Allen, 2012), which we were not able to fully  
501 characterize in this experiment. Though we did not observe notable amounts of accumulated  
502 benthic algae in our tanks, even small amounts could have contributed to total ecosystem  
503 fluxes and led to covariation in total biomass with temperature. If the ratio of phytoplankton  
504 to benthic algae was temperature-dependent (Dossena *et al.*, 2012), our primary producer  
505 biomass estimates may have increasingly under-represented total algal biomass at higher  
506 temperatures. In our experiment, we would expect any contribution of benthic algae to NPP to  
507 increase over time, and be strongest in weeks 8 and 9 after having had time to accumulate  
508 biomass. However, there is no apparent shift in the slopes of NPP vs temperature as time  
509 progresses (Fig. 2A), suggesting that accumulated benthic algal biomass did not confound our  
510 estimate of NPP over the thermal gradient. Nonetheless, to be conservative, we did not  
511 present mass-normalized NPP estimates because we could not normalize to any benthic algal  
512 metabolic biomass. Covariation between biomass and temperature is common across  
513 geographic variation in temperature (Michaletz *et al.*, 2014; Padfield *et al.*, 2017) and  
514 therefore present in other estimates of NPP across broad spatial scales when biomass cannot  
515 be estimated well.

516         Another possible reason for the deviation between observed and expected effects of  
517 temperature on net oxygen production rates is that resource availability to phytoplankton may  
518 have co-varied with temperature such that warmer tanks were less resource-limited. Some  
519 cyanobacteria species that increased in our tanks can fix atmospheric nitrogen, but are  
520 competitively inferior under conditions of high ambient nitrogen (Hecky & Kilham, 1988).  
521 Nitrogen fixation requires the enzyme nitrogenase, which has a biphasic temperature  
522 dependence ( $E_a = -2.18$  eV below 22°C and  $E_a = -0.65$  eV above 22°C (Ceuterick *et al.*,  
523 1978)). If metabolically active, we speculate that these species may have supplied additional

524 bioavailable N to experimental systems at the warmer end of the thermal gradient (Anderson-  
525 Teixeira *et al.*, 2008; Welter *et al.*, 2014). Nutrient limitation may have been eased at higher  
526 temperatures by yet another mechanism: all food chains would have included microbial  
527 assemblages that may have been recycling nutrients faster at higher temperatures, with  
528 respiration-limited metabolic rates (López-Urrutia & Morán, 2007; Beveridge & Humphries,  
529 2010). Fully understanding the effects of temperature on communities and their functions will  
530 require including microbial and benthic functional groups.

531 We observed no sign of ecosystem collapse with warming. Changes in community  
532 structure and the increase in trophic control along the temperature gradient appear to be  
533 exponential and monotonic (Eqn 1b, Fig. 2), suggesting that observations made from only two  
534 temperatures as is typical of many community-level warming experiments may extend to  
535 broader thermal gradients using nonlinear (exponential) models (Fig. 2D, Fig. 3). In this  
536 pattern, there is little evidence of abrupt transitions that might be expected if thermal stress  
537 responses by individual phenotypes emerged at the ecosystem scale. While individual species  
538 may experience thermal stress and decline in performance at high temperatures, in our  
539 systems these effects were functionally compensated for by other species and increases in per  
540 capita performance. The limits to what temperatures could be extrapolated to are not clear  
541 from our data, but we would not expect NPP and ER to continue to increase as observed  
542 beyond 35C.

543 Predators, as expected, reduced zooplankton density and body sizes, and caused a  
544 clear trophic cascade. Trophic control, and therefore any mitigating effects of predators on  
545 biomass change, was weak at low temperatures and increasingly strong at higher temperatures  
546 (compare consumer-free control treatment with consumer treatments, Fig. 2D). Over the  
547 temperature gradient, community (biomass, abundance) responses were less related to  
548 temperature in systems with predators relative to grazer-algae systems. This pattern is  
549 consistent with previous findings that systems with two (or even numbers) of trophic levels

550 tend to be more sensitive to warming than systems with odd numbers, due to cascading effects  
551 of predation on primary producers (Hansson *et al.*, 2012; Shurin *et al.*, 2012). In our systems,  
552 food webs with longer food chains were more resistant to community change with warming.  
553 This result contradicts theories in which dynamically responsive predators can make three-  
554 trophic-level systems less stable than shorter food chains (Hastings & Powell, 1991). In our  
555 experiment, predators were not dynamically responsive. In this way, they represent mortality  
556 for zooplankton that may have varied with temperature effects on per capita predation rates by  
557 predators, but not demography. In many systems, predators are subsidized by other habitats  
558 and food sources, and their populations are not dynamically coupled to prey; in fact, this  
559 decoupling has been shown to be important in thermally stratified systems (Tunney *et al.*,  
560 2014). However, our results cannot be extended directly to systems with local dynamic  
561 predator population.

562         Metabolic scaling theory provides an ecological framework that can produce  
563 functional responses that relate environmental temperature changes to ecological changes  
564 (Padfield *et al.*, 2017). Still missing is a clear understanding of how metabolic temperature  
565 dependence emerges at the community level in simple food webs, where effects of species  
566 interactions, phenotypic plasticity, evolution and resource limitation can be strong and  
567 dominate signals of environmental change (Padfield *et al.*, 2016; 2017). Despite recent  
568 advances incorporating light limitation, evolutionary change, trophic interactions and other  
569 factors into the metabolic scaling theory framework, empirical tests at the community level  
570 such as ours can further shed light on whether there are reliable functional responses of  
571 community-scale processes to temperature change. Our study suggests that for oxygen fluxes,  
572 metabolic temperature dependence functions associated with MST might be used to model  
573 changes with temperature across systems. Changes in species composition and community  
574 structure occur within the context set by temperature constraints on energy fluxes via  
575 fundamental metabolic processes (Bruno *et al.*, 2015; Padfield *et al.*, 2016; 2017). To extend

576 our findings to a conjecture about implications for climate change, we suggest that  
577 conservation actions that maintain predators and top down control may also promote an  
578 ecosystem that changes less with temperature than a system with a large abundance of  
579 grazers. Taken together, these results suggest our efforts to predict community change with  
580 warming may benefit from the general metabolic scaling theory framework to understand  
581 even local-scale effects of temperature change at the community level.

582

583 ***Acknowledgments***

584 *We thank W. Cheung and F. Ratcliffe for sampling assistance and D. Song for assistance*  
585 *during zooplankton identification. UBC Mobility Funds to JG, NSERC Discovery Grant to*  
586 *MO.*

587

588

## References

- 589 Allen AP, Gillooly JF, Brown JH (2005) Linking the global carbon cycle to individual  
590 metabolism. *Functional Ecology*, **19**, 202–213.
- 591 Anderson-Teixeira KJ, Vitousek PM, Brown JH (2008) Amplified temperature dependence in  
592 ecosystems developing on the lava flows of Mauna Loa, Hawai'i. *Proceedings of the*  
593 *National Academy of Sciences of the USA*, **105**, 228–233.
- 594 Atwood TB, Hammill E, Kratina P, Greig HS, Shurin JB, Richardson JS (2015) Warming  
595 alters food web-driven changes in the CO<sub>2</sub> flux of experimental pond ecosystems. *Biology*  
596 *Letters*, **11**.
- 597 Barneche DR, Kulbicki M, Floeter SR, Friedlander AM, Maina J, Allen AP (2014) Scaling  
598 metabolism from individuals to reef-fish communities at broad spatial scales. *Ecology*  
599 *Letters*, **17**, 1067–1076.
- 600 Beisner B, McCauley E, Wrona F (1996) Temperature-mediated dynamics of planktonic food  
601 chains: the effect of an invertebrate carnivore. *Freshwater Biology*, **35**, 219–232.
- 602 Beisner BE, Peres-Neto PR (2009) Seasonal trophic dynamics affect zooplankton community  
603 variability. *Freshwater Biology*, **54**, 2351–2363.
- 604 Beveridge OS, Humphries S (2010) The interacting effects of temperature and food chain  
605 length on trophic abundance and ecosystem function. *Journal of Animal Ecology*, **79**,  
606 693–700.
- 607 Brauer VS, De Jonge VN, Buma AGJ, Weissing FJ (2009) Does universal temperature  
608 dependence apply to communities? An experimental test using natural marine plankton  
609 assemblages. *Oikos*, **118**, 1102–1108.
- 610 Brown JH, Gillooly JF, Allen AP, Savage VM, West GB (2004) Toward a metabolic theory  
611 of ecology. *Ecology*, **85**, 1771–1789.
- 612 Bruno JF, Carr LA, O'Connor MI (2015) Exploring the role of temperature in the ocean  
613 through metabolic scaling. *Ecology*, **96**, 3126–3140.
- 614 Ceuterick F, Peeters J, Heremans K, De Smedt H, Olbrechts H (1978) Effect of high pressure,  
615 detergents and phospholipase on the break in the Arrhenius plot of *Azotobacter*  
616 nitrogenase. *European Journal of Biochemistry*, **87**, 401–407.
- 617 Cottingham KL, Lennon JT, Brown BL (2005) Knowing when to draw the line: designing  
618 more informative ecological experiments. *Frontiers in Ecology and the Environment*, **3**,  
619 145–152.
- 620 Cuddington K, Fortin MJ, Gerber LR, Hastings A, Liebhold A, O'Connor M, Ray C (2013)  
621 Process-based models are required to manage ecological systems in a changing world.  
622 *Ecosphere*, **4**, art20–12.
- 623 Dell AI, Pawar S, Savage VM (2013) The thermal dependence of biological traits. *Ecology*,  
624 **94**, 1205–1206.
- 625 DeLong JP, Gilbert B, Shurin JB et al. (2015) The body size dependence of trophic cascades.  
626 *The American Naturalist*, **185**, 354–366.
- 627 Dossena M, Yvon-Durocher G, Grey J, Montoya JM, Perkins DM, Trimmer M, Woodward G  
628 (2012) Warming alters community size structure and ecosystem functioning. *Proceedings*  
629 *of the Royal Society B-Biological Sciences*, **279**, 3011–3019.
- 630 Enquist BJ, Kerkhoff AJ, Huxman TE, Economo EP (2007) Adaptive differences in plant  
631 physiology and ecosystem paradoxes: insights from metabolic scaling theory. *Global*  
632 *Change Biology*, **13**, 591–609.
- 633 Estes JA, Terborgh J, Brashares JS et al. (2011) Trophic downgrading of planet Earth.  
634 *Science*, **333**, 301–306.
- 635 Figueiras A, Domenech-Massons JM, Cadarso C (1998) Regression models: calculating the  
636 confidence interval of effects in the presence of interactions. *Statistics in Medicine*, **17**,  
637 2099–2105.



- 638 Geider RJ, MacIntyre HL, Kana TM (1997) A dynamical model of phytoplankton growth and  
639 acclimation: response of the balanced growth rate to light, nutrient limitation and  
640 temperature. *Marine Ecology Progress Series*, **148**, 187–200.
- 641 Gilbert B, Tunney TD, McCann KS et al. (2014) A bioenergetic framework for the  
642 temperature dependence of trophic interactions. *Ecology Letters*, **17**, 902–914.
- 643 Gillooly JF, Brown JH, West GB, Savage VM, Charnov EL (2001) Effects of size and  
644 temperature on metabolic rate. *Science*, **293**, 2248–2251.
- 645 Gotelli NJ, Ellison AM (2013) Chapter 7: A Bestiary of Experimental & Sampling Designs.  
646 In: *A Primer of Ecological Statistics*, 2nd edn, p. 614. Sinauer Associates Incorporated,  
647 Sunderland, Massachusetts, USA.
- 648 Hanson PC, Bade DL, Carpenter SR (2003) Lake metabolism: Relationships with dissolved  
649 organic carbon and phosphorus. *Limnology and Oceanography*.
- 650 Hansson L-A, Nicolle A, Granéli W et al. (2012) Food-chain length alters community  
651 responses to global change in aquatic systems. *Nature Climate Change*, **3**, 228–233.
- 652 Hastings A, Powell T (1991) Chaos in a Three-Species Food Chain. *Ecology*, **72**, 896–903.
- 653 Hecky RE, Kilham P (1988) Nutrient limitation of phytoplankton in freshwater and marine  
654 environments: A review of recent evidence on the effects of enrichment. *Limnology and*  
655 *Oceanography*, **33**, 796–822.
- 656 Kordas RL, Harley CDG, O'Connor MI (2011) Community ecology in a warming world: The  
657 influence of temperature on interspecific interactions in marine systems. *Journal of*  
658 *Experimental Marine Biology and Ecology*, **400**, 218–226.
- 659 Kratina P, Greig HS, Thompson PL, Carvalho-Pereira TSA, Shurin JB (2012) Warming  
660 modifies trophic cascades and eutrophication in experimental freshwater communities.  
661 *Ecology*, **93**, 1421–1430.
- 662 López-Urrutia Á, Morán XAG (2007) Resource limitation of bacterial production distorts the  
663 temperature dependence of oceanic carbon cycling. *Ecology*, **88**, 817–822.
- 664 López-Urrutia Á, San Martin E, Harris RP, Irigoien X (2006) Scaling the metabolic balance  
665 of the oceans. *Proceedings of the National Academy of Sciences of the USA*, **103**, 8739–  
666 8744.
- 667 Marzolf ER, Mulholland PJ, Steinman AD (1994) Improvements to the diurnal upstream–  
668 downstream dissolved oxygen change technique for determining whole-stream  
669 metabolism in small streams. *Canadian Journal of Fisheries and Aquatic Sciences*, **51**,  
670 1591–1599.
- 671 Mcardle BH, Lawton JH (1979) Effects of prey-size and predator-instar on the predation of  
672 *Daphnia* by *Notonecta*. *Ecological Entomology*, **4**, 267–275.
- 673 Michaletz ST, Cheng D, Kerkhoff AJ, Enquist BJ (2014) Convergence of terrestrial plant  
674 production across global climate gradients. *Nature*, **512**.
- 675 O'Connor MI, Piehler MF, Leech DM, Anton A, Bruno JF (2009) Warming and resource  
676 availability shift food web structure and metabolism. *PLoS Biology*, **7**.
- 677 O'Connor MI (2009) Warming strengthens an herbivore–plant interaction. *Ecology*, **90**, 388–  
678 398.
- 679 O'Connor MI, Gilbert B, Brown CJ (2011) Theoretical predictions for how temperature  
680 affects the dynamics of interacting herbivores and plants. *The American Naturalist*, **178**,  
681 626–638.
- 682 Padfield D, Lowe C, Buckling A et al. (2017) Metabolic compensation constrains the  
683 temperature dependence of gross primary production. (ed Jeyasingh P). *Ecology Letters*,  
684 **20**, 1250–1260.
- 685 Padfield D, Yvon Durocher G, Buckling A, Jennings S, Yvon-Durocher G (2016) Rapid  
686 evolution of metabolic traits explains thermal adaptation in phytoplankton. *Ecology*  
687 *Letters*, **19**, 133–142.
- 688 Petchey OL, McPhearson PT, Casey TM, Morin PJ (1999) Environmental warming alters



- 689 food-web structure and ecosystem function. *Nature*, **402**, 69–72.
- 690 Polis GA, Sears A, Huxel GR, Strong DR (2000) When is a trophic cascade a trophic  
691 cascade? *Trends in Ecology & ...*
- 692 Schindler DE, Carpenter SR, Cole JJ, Kitchell JF, Pace ML (1997) Influence of food web  
693 structure on carbon exchange between lakes and the atmosphere. *Science*, **277**, 248–251.
- 694 Schmitz O, Post E, Burns CE, Johnston KM (2003) Ecosystem responses to global climate  
695 change: moving beyond color mapping. *Bioscience*, **53**, 1199–1205.
- 696 Shurin JB, Clasen JL, Greig HS, Kratina P, Thompson PL (2012) Warming shifts top-down  
697 and bottom-up control of pond food web structure and function. *Philosophical  
698 Transactions of the Royal Society of London B: Biological Sciences*, **367**, 3008–3017.
- 699 Tilman D, HilleRisLambers J, Harpole S, Dybzinski R, Fargione J, Clark C, Lehman C  
700 (2004) Does Metabolic Theory Apply To Community Ecology? It's A Matter Of Scale.  
701 *Ecology*, **85**, 1797–1799.
- 702 Tunney TD, McCann KS, Lester NP, Shuter BJ (2014) Effects of differential habitat warming  
703 on complex communities. *Proceedings of the National Academy of Sciences of the United  
704 States of America*, **111**, 8077–8082.
- 705 Utermöhl H (1958) Zur Vervollkommnung der quantitativen Phytoplankton-Methodik.  
706 *Mitteilungen Internationale Vereinigung fuer Theoretische und Angewandte Limnologie*,  
707 **9**, 1–38.
- 708 van de Pol M, Wright J (2009) A simple method for distinguishing within- versus between-  
709 subject effects using mixed models. *Animal Behaviour*, **77**, 753–758.
- 710 Welter JR, Benstead JP, Cross WF, Hood JM, Huryn AD, Johnson PW, Williamson TJ (2014)  
711 Does N<sub>2</sub> fixation amplify the temperature dependence of ecosystem metabolism?  
712 *Ecology*, **96**, 603–610.
- 713 Wohlers J, Engel A, Zollner E et al. (2009) Changes in biogenic carbon flow in response to  
714 sea surface warming. *Proceedings of the National Academy of Sciences of the USA*, **106**,  
715 7067–7072.
- 716 Yvon-Durocher G, Allen AP (2012) Linking community size structure and ecosystem  
717 functioning using metabolic theory. *Philosophical Transactions of the Royal Society of  
718 London B: Biological Sciences*, **367**, 2998–3007.
- 719 Yvon-Durocher G, Caffrey JM, Cescatti A et al. (2012) Reconciling the temperature  
720 dependence of respiration across timescales and ecosystem types. *Nature*, **487**, 472–476.
- 721 Yvon-Durocher G, Jones JI, Trimmer M, Woodward G, Montoya JM (2010) Warming alters  
722 the metabolic balance of ecosystems. *Philosophical Transactions of the Royal Society of  
723 London B: Biological Sciences*, **365**, 2117–2126.
- 724
- 725
